# Supplementary material for: Carbon nanotubes modified conductive ink for application to paper-based electrochemical biosensors for pathogenic DNA detection
Source: Royal Society of Chemistry journal article supplement (doi:10.1039/d3nj01557b), 2023-01-01
Supplement: d3nj01557b1.pdf [file d3nj01557b1.pdf]

## Supplementary Information

### **Carbon nanotubes-modified conductive ink for application to paper-based electrochemical biosensor for pathogenic DNA detection**

Niharika Gupta<sup>1</sup>, D. Kumar<sup>2</sup>, Asmita Das<sup>1</sup>, Seema Sood<sup>3</sup>, Bansi D. Malhotra<sup>1,\*</sup>

<sup>1</sup>Department of Biotechnology, Delhi Technological University, Delhi 110042, INDIA

<sup>2</sup>Department of Applied Chemistry, Delhi Technological University, Delhi 110042, INDIA

<sup>3</sup>Department of Microbiology, All India Institute of Medical Sciences (AIIMS), New Delhi 110016, India

### **S1. Immobilization of avidin on carboxylated magnetic beads**

The manufacturer's protocol was followed for the immobilization of avidin on carboxylated magnetic beads (MBs) with slight modifications. Briefly, 10 mg of beads were first taken and washed with 0.1 M NaOH for 10 min (3×). This was followed by washing with double distilled water (3×) by slow tilt rotation. Thereafter, freshly prepared solutions of EDC ( $50 \mu\text{g mL}^{-1}$ ) and NHS ( $150 \mu\text{g mL}^{-1}$ ) were added to the MBs to a final volume of 100  $\mu\text{L}$ . The beads were then incubated at room temperature ( $25 \text{ }^\circ\text{C}$ ) for 30 min on slow tilt rotation. These activated beads were then washed with double distilled water (1 mL; 3×) to remove any unreacted and extra EDC/NHS. Avidin was then added to the beads ( $50 \mu\text{g}$  avidin per mg of beads) and the volume was made up to 100  $\mu\text{l}$  by double distilled water. This mixture was allowed to incubate at room temperature for 2 h to yield MBs covalently linked with avidin via amide bond formation. Thus formed Av/MBs complexes were stored at  $4 \text{ }^\circ\text{C}$  till further use.

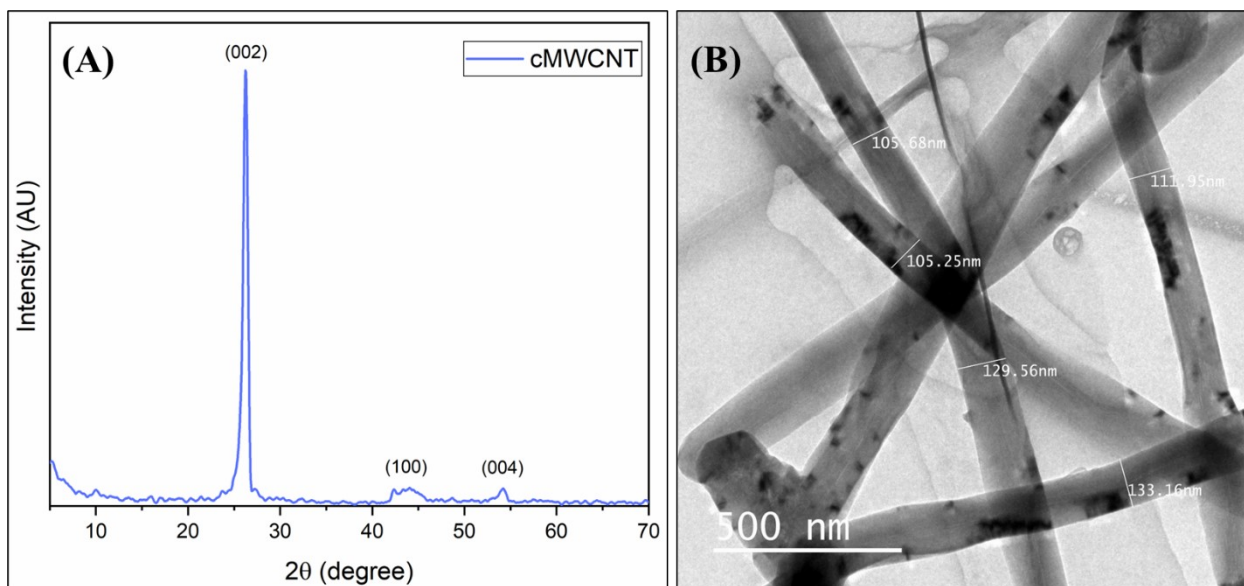

**Figure S1.** (A) XRD spectrum, and (B) TEM image of the cMWCNTs used in the formulation of conductive ink.

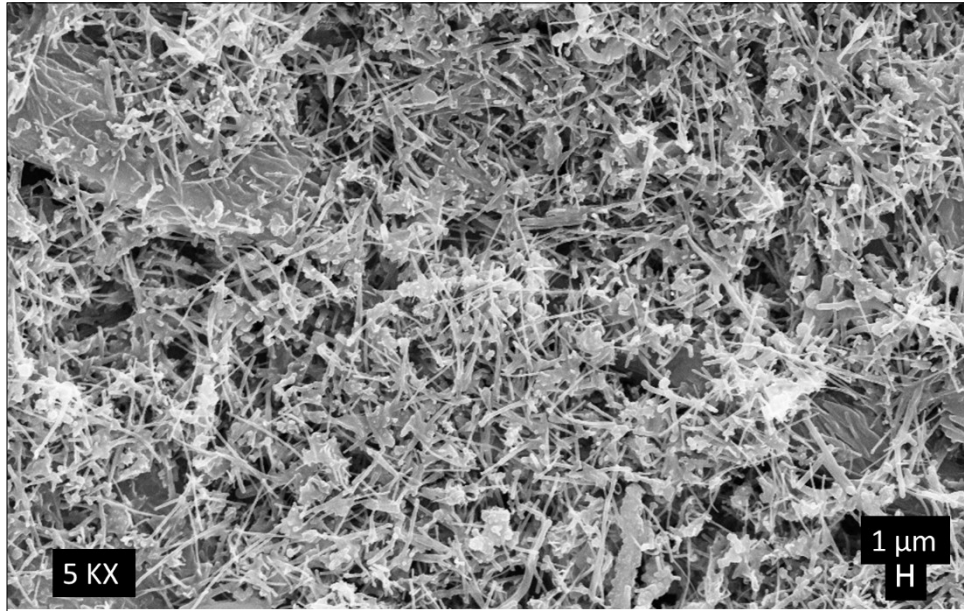

**Figure S2.** SEM image of paper modified with cMWCNT dispersed in PS80.

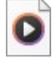

Video\_Paper conductivity.mp4

**S2. Video showing the use of the cMWCNT@paper electrodes to light a red LED and demonstrating their conductivity**

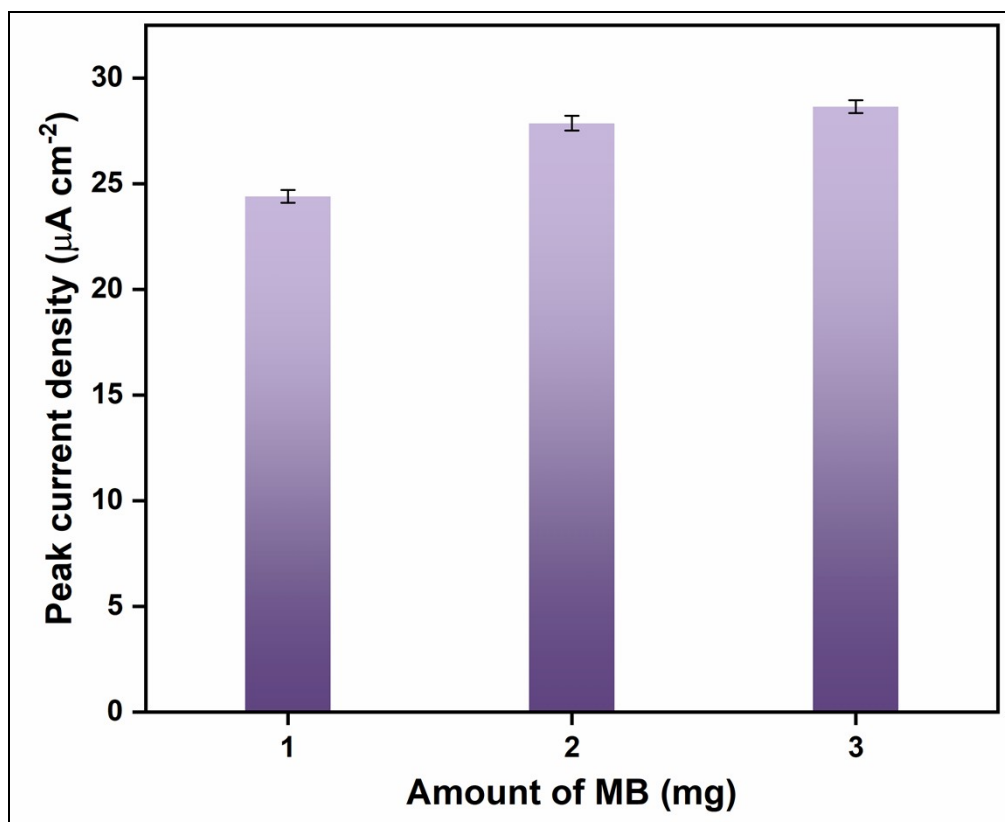

**Figure S3.** Peak current response of the C-T-D/Av/MB/cMWCNT@paper electrodes with respect to different amounts of MB.

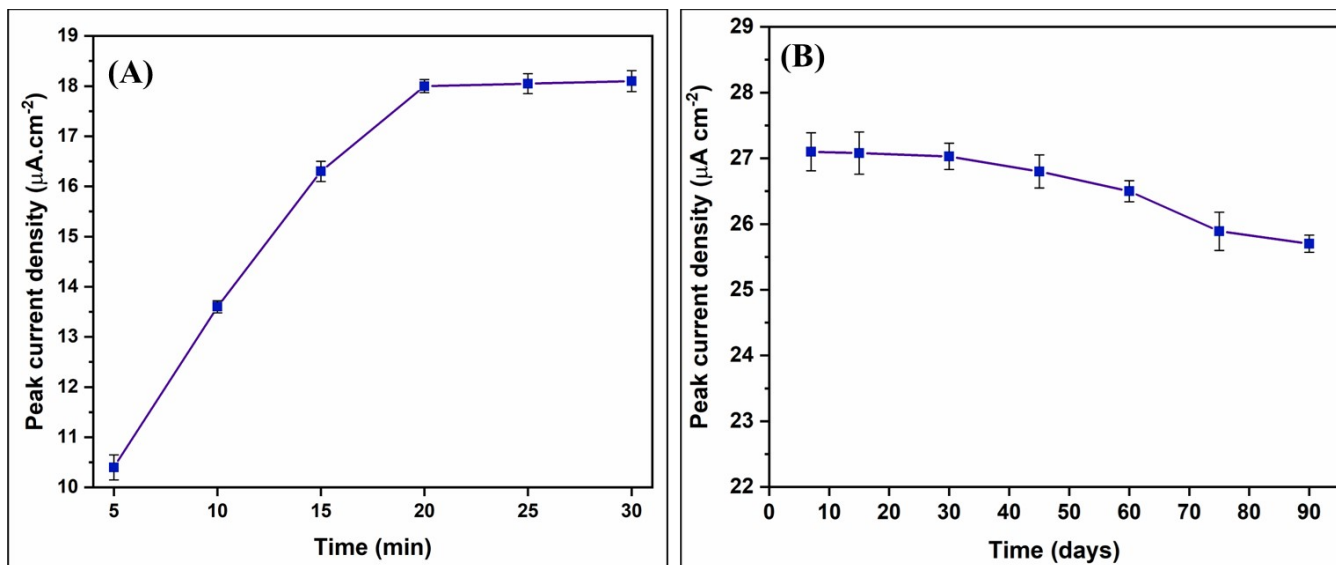

**Figure S4.** (A) The peak current density of the C-T-D/Av/MB/cMWCNT@paper electrode for 1 pM target concentration (*porA* TP) with time, and (B) the peak current density of the cMWCNT@paper electrodes over a period (7-90 days) indicating storage stability.
